# Supplementary material
Source: PubMed Central journal article supplement (PMC5568637)
Supplement: NIHMS894486-supplement-1.pdf [file NIHMS894486-supplement-1.pdf]

## Supporting Information

### Unprecedented ( $\mu$ -1,1-Peroxo)diferric Structure for the Ambiphilic Orange Peroxo Intermediate of the Nonheme *N*-Oxygenase CmlI

Andrew J. Jasniewski,<sup>†,‡,#</sup> Anna J. Komor,<sup>†,‡,#</sup> John D. Lipscomb,<sup>\*,§,‡</sup> and Lawrence Que, Jr.<sup>\*,†,‡</sup>

<sup>†</sup>Department of Chemistry, <sup>§</sup>Department of Biochemistry Molecular Biology, and Biophysics, and <sup>‡</sup>Center for Metals in Biocatalysis, University of Minnesota, Minneapolis, Minnesota 55455

#### Joint First Authors

<sup>#</sup>Contributed equally to the study

#### \*Corresponding authors

J.D.L.: Tel: (612) 625-6454; Fax, (612) 624-5121; E-mail, lipsc001@umn.edu

L. Q.: Tel: (612) 625-0389; Fax, (612) 625-7029; E-mail, larryque@umn.edu

| Table of Contents                                                                    | Page Number |
|--------------------------------------------------------------------------------------|-------------|
| Figure S1. Pre-edge region analysis of CmlI <sup>R</sup>                             | 3           |
| Figure S2. Pre-edge region analysis of CmlI <sup>Ox</sup>                            | 4           |
| Figure S3. Pre-edge region analysis of CmlI <sup>P</sup>                             | 5           |
| Figure S4. EXAFS data of CmlI <sup>R</sup>                                           | 6           |
| Table S1. Fit parameters for CmlI <sup>R</sup>                                       | 7           |
| Figure S5. EXAFS data of CmlI <sup>Ox</sup>                                          | 8           |
| Table S2. Fit parameters for CmlI <sup>Ox</sup>                                      | 9           |
| Figure S6. EXAFS data of CmlI <sup>P</sup>                                           | 10          |
| Table S3. Fit parameters for CmlI <sup>P</sup>                                       | 11          |
| Table S4. Component Analysis of Pre-edge of CmlI                                     | 13          |
| Figure S7. Full resonance Raman spectra for CmlI <sup>Ox</sup> and CmlI <sup>P</sup> | 14          |

**General EXAFS considerations.** In the fit tables of EXAFS data, N refers to the number of scatterers used for a particular shell, R is the distance of the scattering shell,  $\sigma^2$  is the mean-squared deviation (or Debye-Waller factor),  $E_0$  is the edge shift parameter, and the goodness of fit (GOF) parameters are calculated as  $F = \sqrt{\sum k^6 (\chi_{\text{exp}} - \chi_{\text{calc}})^2}$ ,

$F' = \sqrt{\sum k^6 (\chi_{\text{exp}} - \chi_{\text{calc}})^2 / \sum k^6 \chi_{\text{exp}}^2}$ . For all fits, the amplitude reduction factor ( $S_0^2$ ) was set to 0.9.

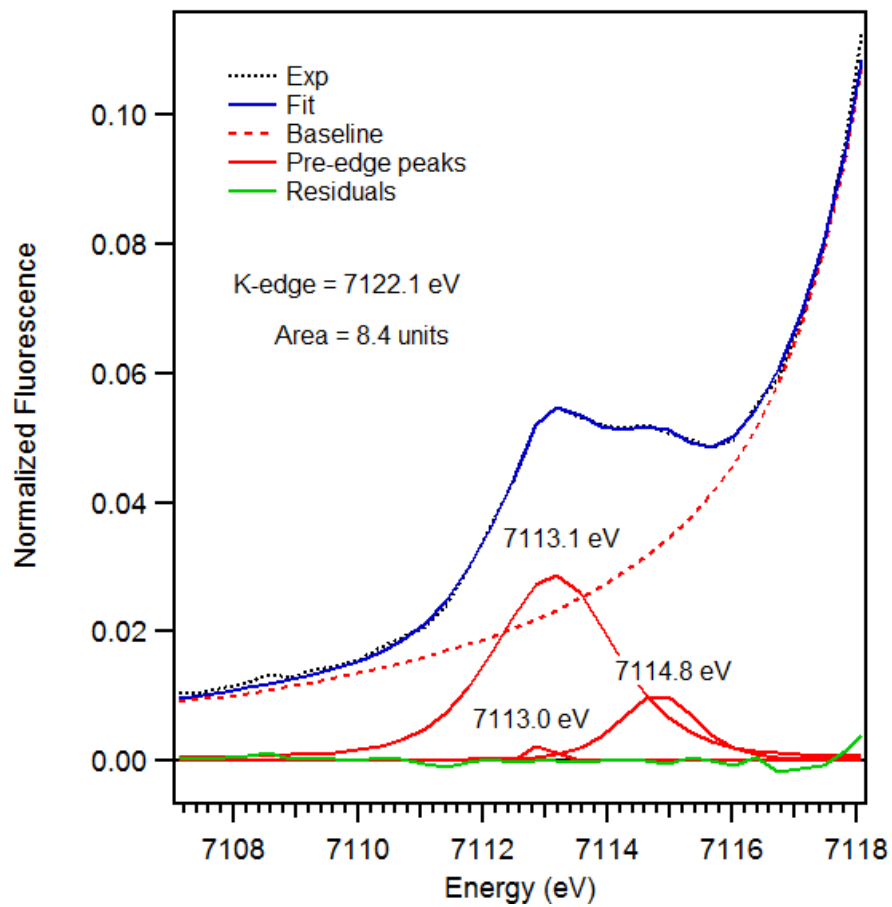

**Figure S1.** Pre-edge region analysis of **CmlI<sup>R</sup>**. The experimental data (black dotted), baseline (red dashed), pre-edge peak components (red solid), residuals (green solid), and total fit (blue solid) are shown.

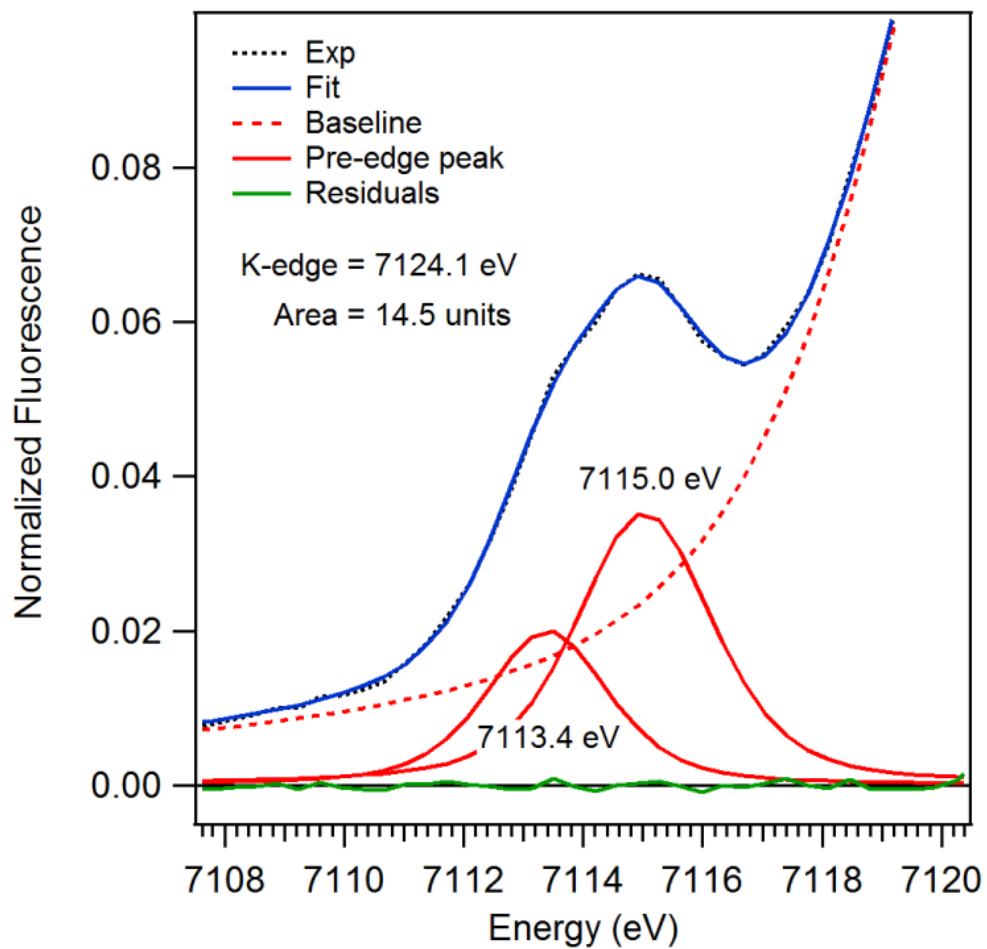

**Figure S2.** Pre-edge region analysis of  $\text{CmII}^{\text{Ox}}$ . The experimental data (black dotted), baseline (red dashed), pre-edge peak components (red solid), residuals (green solid), and total fit (blue solid) are shown.

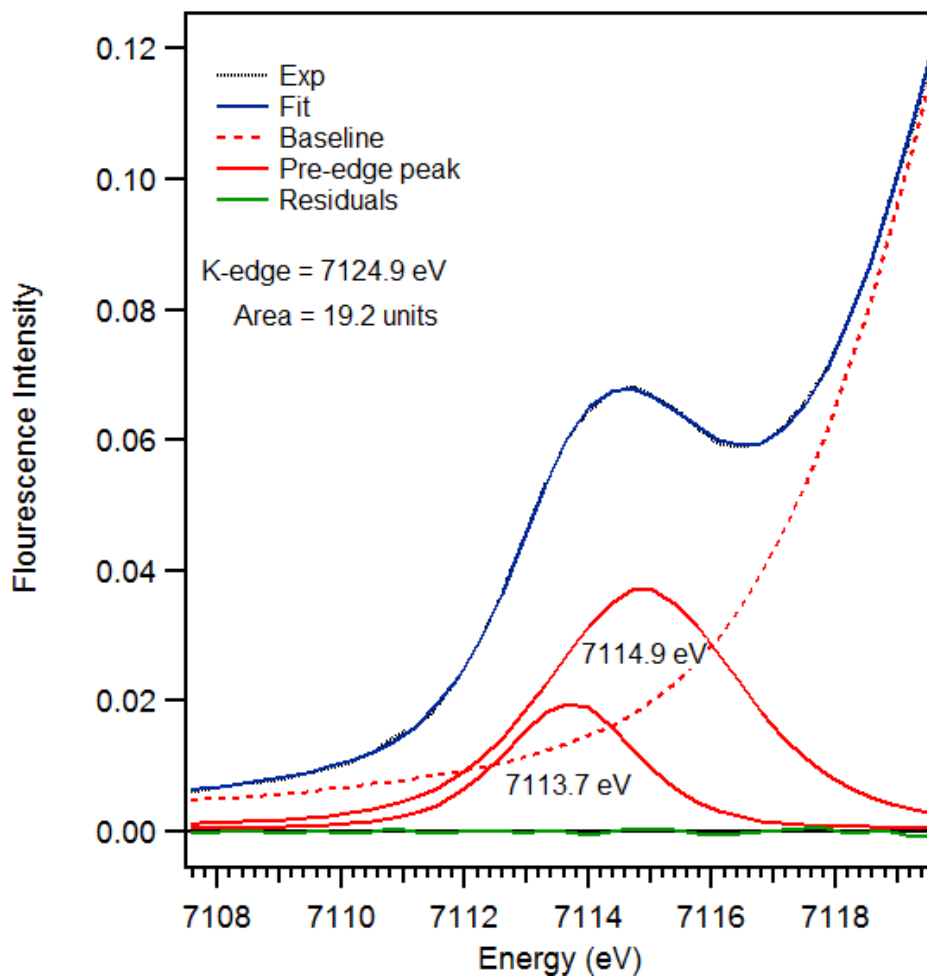

**Figure S3.** Pre-edge region analysis of  $\text{CmII}^{\text{P}}$ . The experimental data (black dotted), baseline (red dashed), pre-edge peak components (red solid), residuals (green solid) and total fit (blue solid) are shown.

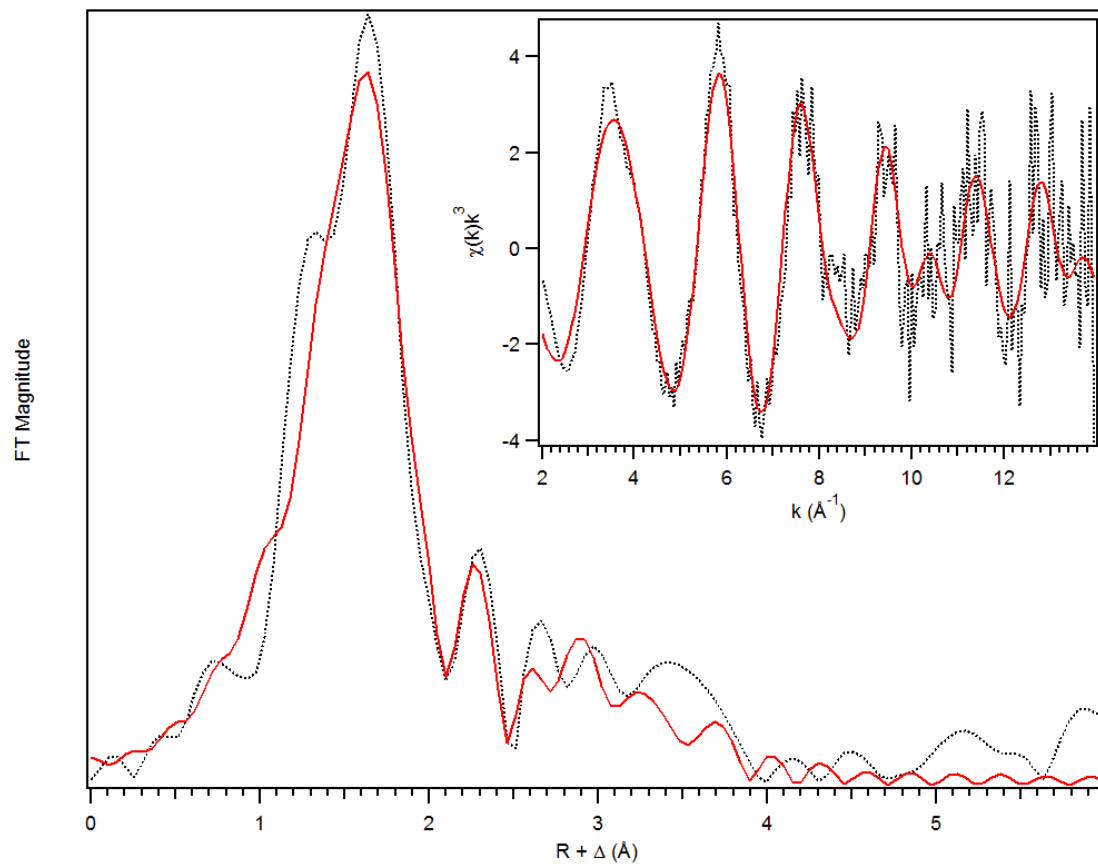

**Figure S4.** Fit (red solid line) of the unfiltered (black dotted) EXAFS data (inset) and corresponding Fourier transform of  $\mathbf{CmII}^{\text{R}}$  (Table S1, Fit 17). Data was fit between  $k = 2\text{--}14 \text{ \AA}^{-1}$ .

**Table S1.** Fit parameters for the unfiltered EXAFS data of **CmII<sup>R</sup>**, between  $k = 2 - 14 \text{ \AA}^{-1}$ .  
Fit 17 gives the most reasonable fit of the experimental data.

| Fit       | Fe-N     |                   | Fe-O                |          | Fe•••Fe           |                     | Fe•••C   |                   | GOF                 |          |             |             |              |            |            |
|-----------|----------|-------------------|---------------------|----------|-------------------|---------------------|----------|-------------------|---------------------|----------|-------------|-------------|--------------|------------|------------|
|           | N        | R( $\text{\AA}$ ) | $\sigma^2(10^{-3})$ | N        | R( $\text{\AA}$ ) | $\sigma^2(10^{-3})$ | N        | R( $\text{\AA}$ ) | $\sigma^2(10^{-3})$ | $E_0$    | F           | F'          |              |            |            |
| 1         | 6        | 2.10              | 7.61                |          |                   |                     |          |                   |                     | -10.3    | 300         | 568         |              |            |            |
| 2         | 5        | 2.10              | 6.23                |          |                   |                     |          |                   |                     | -9.53    | 304         | 572         |              |            |            |
| 3         | 4        | 2.11              | 4.81                |          |                   |                     |          |                   |                     | -8.82    | 323         | 590         |              |            |            |
| 4         | 3        | 2.11              | 3.31                |          |                   |                     |          |                   |                     | -8.22    | 365         | 627         |              |            |            |
| 5         | 3        | 2.12              | 2.60                | 1        | 2.01              | 2.03                |          |                   |                     | -9.71    | 304         | 572         |              |            |            |
| 6         | 4        | 2.11              | 4.06                | 1        | 1.98              | 4.40                |          |                   |                     | -11.2    | 288         | 557         |              |            |            |
| 7         | 5        | 2.10              | 4.99                | 1        | 1.94              | 5.01                |          |                   |                     | -12.8    | 281         | 550         |              |            |            |
| 8         | 4        | 2.11              | 4.03                | 2        | 1.97              | 7.33                |          |                   |                     | -13.6    | 274         | 544         |              |            |            |
| 9         | 4        | 2.13              | 4.87                | 1        | 2.02              | 4.61                |          | 3                 | 3.11                | 4.20     | -8.72       | 257         | 527          |            |            |
| 10        | 4        | 2.12              | 4.83                | 1        | 2.01              | 6.35                |          | 3                 | 3.14                | 0.93     | -9.05       | 240         | 509          |            |            |
|           |          |                   |                     |          |                   |                     |          | 3                 | 2.99                | 3.97     |             |             |              |            |            |
| 11        | 4        | 2.12              | 4.76                | 1        | 2.00              | 5.61                |          | 3                 | 3.15                | 0.87     | -9.66       | 226         | 493          |            |            |
|           |          |                   |                     |          |                   |                     |          | 3                 | 2.99                | 3.68     |             |             |              |            |            |
|           |          |                   |                     |          |                   |                     |          | 1                 | 2.59                | 1.38     |             |             |              |            |            |
| 12        | 4        | 2.12              | 4.76                | 1        | 2.01              | 4.90                | 1        | 3.34              | 9.20                | 3        | 2.99        | 2.77        | -8.88        | 221        | 487        |
|           |          |                   |                     |          |                   |                     |          |                   |                     | 5        | 3.15        | 2.08        |              |            |            |
|           |          |                   |                     |          |                   |                     |          |                   |                     | 1        | 2.60        | 0.85        |              |            |            |
| 13        | 4        | 2.12              | 5.01                | 1        | 2.01              | 5.90                | 1        | 3.35              | 9.54                | 5        | 3.15        | 2.62        | -9.10        | 210        | 475        |
|           |          |                   |                     |          |                   |                     |          |                   |                     | 3        | 2.99        | 3.50        |              |            |            |
|           |          |                   |                     |          |                   |                     |          |                   |                     | 1        | 2.60        | 1.41        |              |            |            |
|           |          |                   |                     |          |                   |                     |          |                   |                     | 4        | 4.01        | 1.06        |              |            |            |
| 14        | 4        | 2.12              | 4.80                | 1        | 2.00              | 5.54                |          |                   |                     | 5        | 3.13        | 3.88        | -9.61        | 217        | 484        |
|           |          |                   |                     |          |                   |                     |          |                   |                     | 3        | 2.96        | 4.31        |              |            |            |
|           |          |                   |                     |          |                   |                     |          |                   |                     | 1        | 2.60        | 2.07        |              |            |            |
|           |          |                   |                     |          |                   |                     |          |                   |                     | 4        | 4.02        | 1.30        |              |            |            |
| 15        | 4        | 2.12              | 4.91                | 1        | 2.01              | 6.72                | 1        | 3.34              | 9.73                | 5        | 3.15        | 2.23        | -9.04        | 223        | 490        |
|           |          |                   |                     |          |                   |                     |          |                   |                     | 3        | 2.99        | 3.16        |              |            |            |
|           |          |                   |                     |          |                   |                     |          |                   |                     | 4        | 4.00        | 1.49        |              |            |            |
| 16        | 4        | 2.13              | 5.11                | 1        | 2.02              | 3.96                | 1        | 3.38              | 10.36               | 5        | 3.13        | 7.48        | -8.09        | 227        | 495        |
|           |          |                   |                     |          |                   |                     |          |                   |                     | 4        | 4.02        | 1.32        |              |            |            |
|           |          |                   |                     |          |                   |                     |          |                   |                     | 1        | 2.61        | 1.36        |              |            |            |
| <b>17</b> | <b>5</b> | <b>2.10</b>       | <b>5.02</b>         | <b>1</b> | <b>1.94</b>       | <b>5.35</b>         | <b>1</b> | <b>3.35</b>       | <b>9.90</b>         | <b>1</b> | <b>2.58</b> | <b>1.35</b> | <b>-12.0</b> | <b>206</b> | <b>470</b> |
|           |          |                   |                     |          |                   |                     |          |                   |                     | <b>3</b> | <b>2.98</b> | <b>2.76</b> |              |            |            |
|           |          |                   |                     |          |                   |                     |          |                   |                     | <b>5</b> | <b>3.14</b> | <b>2.48</b> |              |            |            |
|           |          |                   |                     |          |                   |                     |          |                   |                     | <b>4</b> | <b>3.99</b> | <b>1.15</b> |              |            |            |
| 18        | 4        | 2.11              | 4.71                |          |                   |                     | 1        | 3.35              | 8.37                | 1        | 2.60        | 1.08        | -7.27        | 233        | 501        |
|           |          |                   |                     |          |                   |                     |          |                   |                     | 3        | 3.00        | 2.37        |              |            |            |
|           |          |                   |                     |          |                   |                     |          |                   |                     | 5        | 3.16        | 1.74        |              |            |            |
|           |          |                   |                     |          |                   |                     |          |                   |                     | 4        | 4.02        | 0.75        |              |            |            |

**Table S1 (continued).** Fit parameters for the unfiltered EXAFS data of  $\text{CmII}^{\text{R}}$ , between  $k = 2 - 14 \text{ \AA}^{-1}$ . Fit 17 gives the most reasonable fit of the experimental data.

| Fit | Fe-N |      |                     | Fe-O |      |                     | Fe•••Fe |      |                     | Fe•••C |      |                     | GOF   |     |     |
|-----|------|------|---------------------|------|------|---------------------|---------|------|---------------------|--------|------|---------------------|-------|-----|-----|
|     | N    | R(Å) | $\sigma^2(10^{-3})$ | N    | R(Å) | $\sigma^2(10^{-3})$ | N       | R(Å) | $\sigma^2(10^{-3})$ | N      | R(Å) | $\sigma^2(10^{-3})$ | $E_0$ | F   | F'  |
| 19  | 5    | 2.11 | 4.75                | 1    | 1.94 | 4.36                | 1       | 3.34 | 8.55                | 0.5    | 2.58 | -2.50               | -11.7 | 198 | 462 |
|     |      |      |                     |      |      |                     |         |      |                     | 3      | 2.99 | 1.03                |       |     |     |
|     |      |      |                     |      |      |                     |         |      |                     | 5      | 3.14 | 1.15                |       |     |     |
|     |      |      |                     |      |      |                     |         |      |                     | 4      | 3.99 | 3.31                |       |     |     |

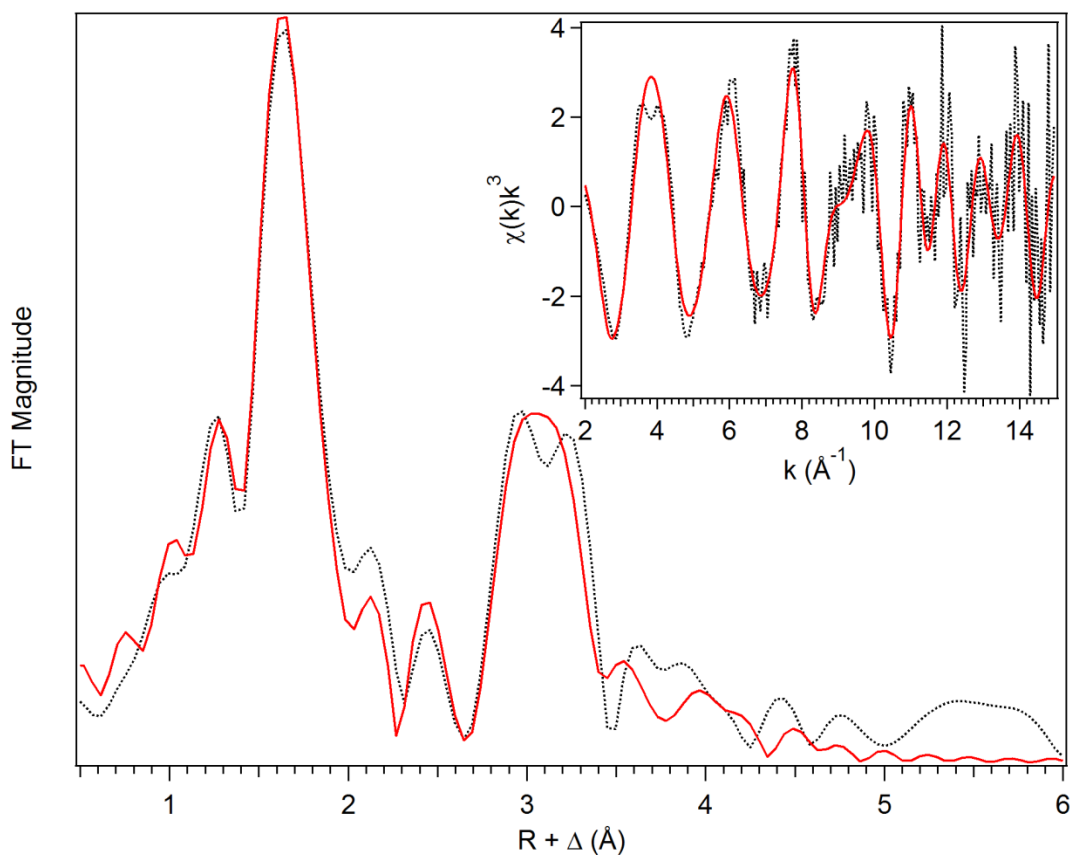

**Figure S5.** Fit (red solid line) of the unfiltered (black dotted) EXAFS data (inset) and corresponding Fourier transform of  $\text{CmII}^{\text{Ox}}$  (Table S2, Fit 15). Data was fit between  $k = 2 - 15 \text{ \AA}^{-1}$ .



**Table S2.** Fit parameters for the unfiltered EXAFS data of **CmII<sup>Ox</sup>**, between  $k = 2 - 15 \text{ \AA}^{-1}$ .

Fit 15 gives the most reasonable fit of the experimental data. The Fe•••C shells at 3.57 and 4.28 Å are consistent with bound His ligands.

| Fit | Fe-N |      |                     | Fe-O |      |                     | Fe•••Fe |      |                     | Fe•••C |      |                     | GOF            |      |     |
|-----|------|------|---------------------|------|------|---------------------|---------|------|---------------------|--------|------|---------------------|----------------|------|-----|
|     | N    | R(Å) | $\sigma^2(10^{-3})$ | N    | R(Å) | $\sigma^2(10^{-3})$ | N       | R(Å) | $\sigma^2(10^{-3})$ | N      | R(Å) | $\sigma^2(10^{-3})$ | E <sub>0</sub> | F    | F'  |
| 1   | 6    | 2.11 | 10.64               |      |      |                     |         |      |                     |        |      |                     | 0.50           | 408  | 704 |
| 2   | 5    | 2.11 | 8.68                |      |      |                     |         |      |                     |        |      |                     | 1.22           | 388  | 687 |
| 3   | 4    | 2.12 | 6.92                |      |      |                     |         |      |                     |        |      |                     | 1.88           | 383  | 682 |
| 4   | 3    | 2.12 | 5.26                |      |      |                     |         |      |                     |        |      |                     | 2.46           | 404  | 701 |
| 5   | 4    | 2.11 | 6.58                | 1    | 1.95 | 18.06               |         |      |                     |        |      |                     | -0.27          | 378  | 678 |
| 6   | 3    | 2.17 | 2.44                | 1    | 2.03 | -0.50               |         |      |                     |        |      |                     | 2.26           | 3.57 | 659 |
| 7   | 3    | 2.18 | 4.56                | 2    | 2.04 | 3.92                |         |      |                     |        |      |                     | 1.33           | 388  | 687 |
| 8   | 3    | 2.16 | 1.74                | 2    | 2.02 | 0.74                |         |      |                     |        |      |                     | -2.42          | 331  | 635 |
|     |      |      |                     | 1    | 1.84 | 3.15                |         |      |                     |        |      |                     |                |      |     |
| 9   | 3    | 2.16 | 1.96                | 2    | 2.02 | 0.94                | 1       | 3.31 | 2.52                |        |      |                     | -1.78          | 248  | 550 |
|     |      |      |                     | 1    | 1.85 | 3.63                |         |      |                     |        |      |                     |                |      |     |
| 10  | 3    | 2.17 | 2.19                | 2    | 2.03 | 1.16                | 1       | 3.31 | 2.35                | 2      | 3.12 | 3.67                | -0.76          | 239  | 538 |
|     |      |      |                     | 1    | 1.85 | 4.45                |         |      |                     |        |      |                     |                |      |     |
| 11  | 3    | 2.15 | 1.82                | 2    | 2.01 | 0.98                | 1       | 3.31 | 3.20                | 2      | 3.07 | 10.44               | -2.85          | 209  | 504 |
|     |      |      |                     | 1    | 1.84 | 3.08                |         |      |                     | 3      | 3.57 | 1.14                |                |      |     |
| 12  | 3    | 2.16 | 1.77                | 2    | 2.01 | 0.99                | 1       | 3.32 | 3.53                | 2      | 3.06 | 9.28                | -2.39          | 190  | 481 |
|     |      |      |                     | 1    | 1.84 | 3.22                |         |      |                     | 3      | 3.58 | 0.55                |                |      |     |
|     |      |      |                     |      |      |                     |         |      |                     | 3      | 4.29 | 1.07                |                |      |     |
| 13  | 3    | 2.15 | 1.79                | 2    | 2.01 | 0.99                | 1       | 3.32 | 3.22                | 2      | 3.07 | 10.95               | -2.65          | 191  | 481 |
|     |      |      |                     | 1    | 1.84 | 3.16                |         |      |                     | 4      | 3.57 | 1.70                |                |      |     |
|     |      |      |                     |      |      |                     |         |      |                     | 3      | 4.29 | 1.18                |                |      |     |
| 14  | 3    | 2.17 | 2.10                | 2    | 2.03 | 1.11                | 1       | 3.31 | 2.40                | 2      | 3.12 | 3.36                | -0.74          | 230  | 528 |
|     |      |      |                     | 1    | 1.85 | 4.28                |         |      |                     | 3      | 4.31 | 3.17                |                |      |     |
| 15  | 3    | 2.15 | 1.73                | 2    | 2.00 | 0.97                | 1       | 3.32 | 3.38                | 4      | 3.57 | 1.39                | -3.79          | 196  | 488 |
|     |      |      |                     | 1    | 1.83 | 2.71                |         |      |                     | 3      | 4.28 | 1.04                |                |      |     |

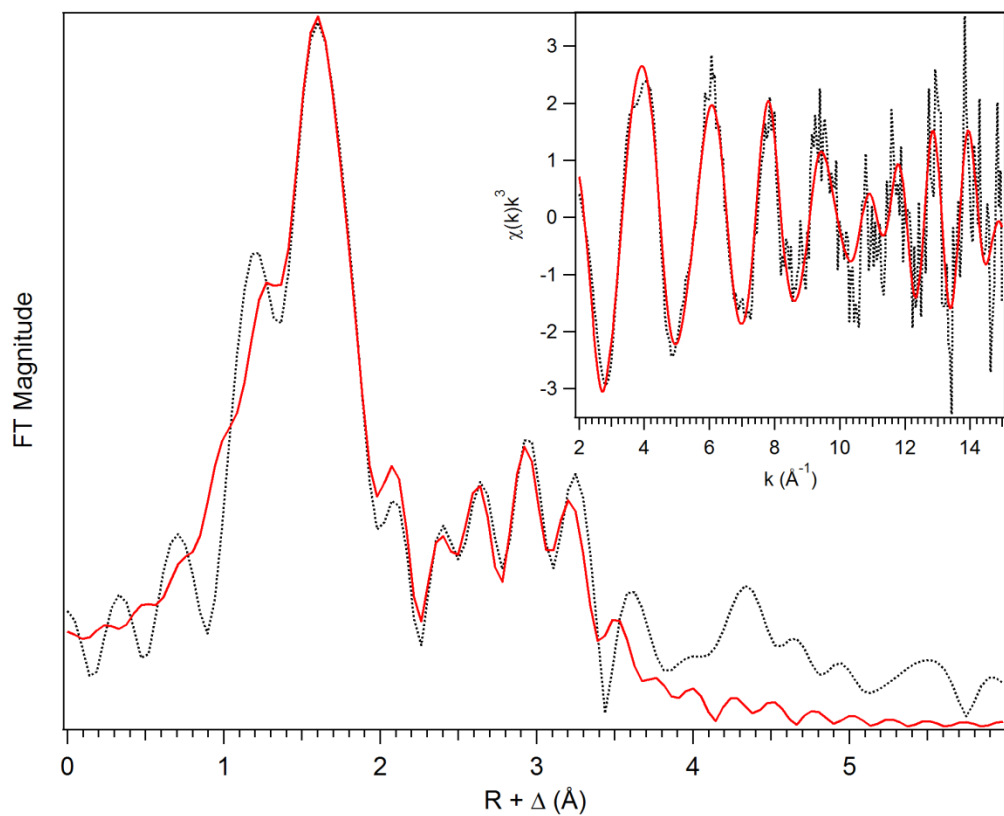

**Figure S6.** Fit (red solid line) of the unfiltered (black dotted) EXAFS data (inset) and corresponding Fourier transform of **CmII<sup>P</sup>** (Table S3, Fit 23). Data was fit between  $k = 2 - 15 \text{ \AA}^{-1}$ .

**Table S3.** Fit parameters for the unfiltered EXAFS data of  $\text{CmII}^{\text{P}}$ , between  $k = 2 - 15 \text{ \AA}^{-1}$ .  
Fit 23 gives the most reasonable fit of the experimental data.

| Fit | Fe-N |                   | Fe-O                |   | Fe•••Fe           |                     | Fe•••C |                   | GOF                 |       |      |       |       |     |     |
|-----|------|-------------------|---------------------|---|-------------------|---------------------|--------|-------------------|---------------------|-------|------|-------|-------|-----|-----|
|     | N    | R( $\text{\AA}$ ) | $\sigma^2(10^{-3})$ | N | R( $\text{\AA}$ ) | $\sigma^2(10^{-3})$ | N      | R( $\text{\AA}$ ) | $\sigma^2(10^{-3})$ | $E_0$ | F    | F'    |       |     |     |
| 1   | 5    | 2.08              | 12.13               |   |                   |                     |        |                   |                     | 1.63  | 202  | 615   |       |     |     |
| 2   | 4    | 2.09              | 9.45                |   |                   |                     |        |                   |                     | 2.62  | 199  | 610   |       |     |     |
| 3   | 3    | 2.10              | 6.99                |   |                   |                     |        |                   |                     | 3.64  | 211  | 629   |       |     |     |
| 4   | 5    | 2.08              | 9.28                | 1 | 1.86              | 9.72                |        |                   |                     | -0.65 | 188  | 594   |       |     |     |
| 5   | 5    | 2.08              | 8.96                | 2 | 1.86              | 14.71               |        |                   |                     | -2.53 | 190  | 599   |       |     |     |
| 6   | 4    | 2.10              | 7.67                | 1 | 1.91              | 9.84                |        |                   |                     | 0.24  | 187  | 593   |       |     |     |
| 7   | 4    | 2.10              | 7.77                | 2 | 1.91              | 15.33               |        |                   |                     | -1.50 | 187  | 592   |       |     |     |
| 8   | 3    | 2.12              | 5.25                | 1 | 1.97              | 4.90                |        |                   |                     | 1.71  | 191  | 599   |       |     |     |
| 9   | 3    | 2.11              | 6.41                | 2 | 1.96              | 13.93               |        |                   |                     | -0.59 | 187  | 593   |       |     |     |
| 10  | 3    | 2.13              | 2.58                | 2 | 1.98              | 2.05                |        |                   |                     | -3.21 | 175  | 573   |       |     |     |
|     |      |                   |                     | 1 | 1.82              | 3.58                |        |                   |                     |       |      |       |       |     |     |
| 11  | 3    | 2.12              | 2.10                | 1 | 1.99              | -0.20               |        |                   |                     | -3.64 | 176  | 574   |       |     |     |
|     |      |                   |                     | 2 | 1.88              | 9.04                |        |                   |                     |       |      |       |       |     |     |
| 12  | 3    | 2.12              | 2.54                | 2 | 1.97              | 1.97                | 1      | 2.83              | 17.88               | -3.29 | 172  | 568   |       |     |     |
|     |      |                   |                     | 1 | 1.82              | 3.39                |        |                   |                     |       |      |       |       |     |     |
| 13  | 3    | 2.13              | 2.54                | 2 | 1.98              | 1.98                | 1      | 3.37              | 35.99               | -3.14 | 175  | 572   |       |     |     |
|     |      |                   |                     | 1 | 1.82              | 3.54                |        |                   |                     |       |      |       |       |     |     |
| 14  | 3    | 2.13              | 3.32                | 2 | 1.99              | 2.76                | 1      | 3.11              | 21.89               | -2.23 | 154  | 536   |       |     |     |
|     |      |                   |                     | 1 | 1.83              | 4.53                |        |                   |                     |       |      |       |       |     |     |
|     |      |                   |                     | 1 | 2.83              | 0.21                |        |                   |                     |       |      |       |       |     |     |
| 15  | 3    | 2.13              | 2.72                | 2 | 1.98              | 2.53                | 1      | 3.29              | 10.99               | 1     | 3.11 | -2.30 | -2.29 | 124 | 483 |
|     |      |                   |                     | 1 | 1.82              | 4.54                |        |                   |                     |       |      |       |       |     |     |
|     |      |                   |                     | 1 | 2.82              | 3.75                |        |                   |                     |       |      |       |       |     |     |
| 16  | 3    | 2.14              | 3.22                | 2 | 1.99              | 3.02                | 1      | 3.30              | 6.34                | 3     | 3.12 | 1.69  | -0.99 | 133 | 499 |
|     |      |                   |                     | 1 | 1.83              | 5.44                |        |                   |                     |       |      |       |       |     |     |
|     |      |                   |                     | 1 | 2.84              | 1.50                |        |                   |                     |       |      |       |       |     |     |
| 17  | 3    | 2.13              | 2.84                | 2 | 1.98              | 2.50                | 1      | 3.11              | 7.61                | 3     | 3.34 | 0.91  | -2.36 | 122 | 478 |
|     |      |                   |                     | 1 | 1.83              | 4.47                |        |                   |                     |       |      |       |       |     |     |
|     |      |                   |                     | 1 | 2.83              | 1.23                |        |                   |                     |       |      |       |       |     |     |
| 18  | 3    | 2.13              | 2.41                | 2 | 1.98              | 1.98                | 1      | 3.34              | 4.23                | 3     | 3.14 | 4.38  | -2.40 | 118 | 469 |
|     |      |                   |                     | 1 | 1.82              | 3.80                |        |                   |                     | 3     | 3.55 | 1.85  |       |     |     |
|     |      |                   |                     | 1 | 2.82              | 1.81                |        |                   |                     |       |      |       |       |     |     |
| 19  | 3    | 2.12              | 6.25                | 2 | 1.96              | 12.77               | 1      | 3.30              | 5.03                | 3     | 3.12 | 1.55  | 0.43  | 130 | 494 |
|     |      |                   |                     | 1 | 2.85              | 1.14                |        |                   |                     | 3     | 3.49 | 9.49  |       |     |     |
| 20  | 3    | 2.13              | 1.98                | 2 | 1.97              | 1.52                | 1      | 3.33              | 2.88                | 3     | 3.15 | 2.58  |       |     |     |
|     |      |                   |                     | 1 | 1.8               | 3.09                |        |                   |                     |       |      |       |       |     |     |
| 21  | 3    | 2.13              | 2.81                | 2 | 1.98              | 2.45                | 1      | 3.1               | 7.66                | 3     | 3.34 | 0.90  | -2.42 | 118 | 470 |
|     |      |                   |                     | 1 | 1.82              | 4.36                |        |                   |                     | 3     | 3.78 | 23.62 |       |     |     |
|     |      |                   |                     | 1 | 2.83              | 1.22                |        |                   |                     |       |      |       |       |     |     |

**Table S3 (continued).** Fit parameters for the unfiltered EXAFS data of  $\text{CmII}^{\text{P}}$ , between  $k = 2 - 15 \text{ \AA}^{-1}$ . Fit 23 gives the most reasonable fit of the experimental data. The  $\text{Fe}\cdots\text{C}$  shells at 3.14, 3.56 and 4.28  $\text{\AA}$  are consistent with bound His ligands.

| Fit       | Fe-N     |                   |                     | Fe-O     |                   |                     | Fe $\cdots$ Fe |                   |                     | Fe $\cdots$ C |                   |                     | GOF          |            |            |             |
|-----------|----------|-------------------|---------------------|----------|-------------------|---------------------|----------------|-------------------|---------------------|---------------|-------------------|---------------------|--------------|------------|------------|-------------|
|           | N        | R( $\text{\AA}$ ) | $\sigma^2(10^{-3})$ | N        | R( $\text{\AA}$ ) | $\sigma^2(10^{-3})$ | N              | R( $\text{\AA}$ ) | $\sigma^2(10^{-3})$ | N             | R( $\text{\AA}$ ) | $\sigma^2(10^{-3})$ | $E_0$        | F          | F'         |             |
| 22        | 3        | 2.13              | 2.47                | 2        | 1.98              | 2.03                | 1              | 3.34              | 4.44                | 3             | 3.14              | 4.84                | -2.11        | 109        | 451        |             |
|           |          |                   |                     | 1        | 1.83              | 3.93                |                |                   |                     |               | 3                 | 3.56                |              |            |            | 1.65        |
|           |          |                   |                     | 1        | 2.82              | 1.54                |                |                   |                     |               | 3                 | 4.39                |              |            |            | 4.64        |
| <b>23</b> | <b>3</b> | <b>2.13</b>       | <b>2.50</b>         | <b>2</b> | <b>1.98</b>       | <b>2.09</b>         | <b>1</b>       | <b>3.35</b>       | <b>4.47</b>         | <b>3</b>      | <b>3.14</b>       | <b>4.87</b>         | <b>-1.86</b> | <b>111</b> | <b>456</b> |             |
|           |          |                   |                     | <b>1</b> | <b>1.83</b>       | <b>4.05</b>         |                |                   |                     |               | <b>3</b>          | <b>3.56</b>         |              |            |            | <b>1.46</b> |
|           |          |                   |                     | <b>1</b> | <b>2.82</b>       | <b>1.50</b>         |                |                   |                     |               | <b>3</b>          | <b>4.28</b>         |              |            |            | <b>5.12</b> |
| 24        | 3        | 2.13              | 2.43                | 2        | 1.97              | 1.95                | 1              | 3.12              | 8.77                | 3             | 3.34              | 0.43                | -3.59        | 116        | 465        |             |
|           |          |                   |                     | 1        | 1.82              | 3.50                |                |                   |                     |               | 3                 | 3.54                |              |            |            | 8.78        |
|           |          |                   |                     | 1        | 2.82              | 1.47                |                |                   |                     |               | 3                 | 4.08                |              |            |            | 14.75       |
| 25        | 3        | 2.14              | 2.89                | 2        | 1.99              | 2.52                | 1              | 3.57              | 7.75                | 3             | 3.12              | 4.61                | -177         | 113        | 459        |             |
|           |          |                   |                     | 1        | 1.83              | 4.66                |                |                   |                     |               | 3                 | 3.34                |              |            |            | 1.43        |
|           |          |                   |                     | 1        | 2.82              | 0.98                |                |                   |                     |               | 3                 | 3.97                |              |            |            | 5.76        |
| 26        | 3        | 2.13              | 2.05                | 2        | 1.98              | 1.66                | 1              | 3.33              | 3.03                | 3             | 3.15              | 2.90                | -2.79        | 130        | 493        |             |
|           |          |                   |                     | 1        | 1.82              | 3.51                |                |                   |                     |               | 3                 | 3.54                |              |            |            | 1.85        |
|           |          |                   |                     |          |                   |                     |                |                   |                     |               | 3                 | 4.25                |              |            |            | 4.99        |
| 27        | 3        | 2.14              | 3.25                | 2        | 1.99              | 3.03                | 1              | 3.30              | 6.45                | 3             | 3.12              | 1.71                | -0.87        | 131        | 496        |             |
|           |          |                   |                     | 1        | 1.84              | 5.59                |                |                   |                     |               | 3                 | 4.29                |              |            |            | 8.00        |
|           |          |                   |                     | 1        | 2.84              | 1.43                |                |                   |                     |               |                   |                     |              |            |            |             |
| 28        | 3        | 2.14              | 3.38                | 2        | 1.99              | 2.97                |                |                   |                     | 3             | 3.09              | 3.59                | -1.24        | 142        | 516        |             |
|           |          |                   |                     | 1        | 1.84              | 5.24                | 3              | 3.60              | 2.10                |               |                   |                     |              |            |            |             |
|           |          |                   |                     | 1        | 2.83              | 0.17                | 3              | 4.30              | 5.64                |               |                   |                     |              |            |            |             |
| 29        | 3        | 2.14              | 2.81                | 2        | 1.99              | 2.37                | 1              | 3.36              | 4.55                | 3             | 3.15              | 7.15                | -1.70        | 111        | 456        |             |
|           |          |                   |                     | 1        | 1.83              | 4.56                |                |                   |                     |               | 3                 | 3.57                |              |            |            | 0.86        |
|           |          |                   |                     | 0.5      | 2.82              | -1.50               |                |                   |                     |               | 3                 | 4.28                |              |            |            | 4.91        |

**Table S4.** Component Analysis of Pre-edge Features of CmlI Intermediates.

| <b>Species</b>           | <b>K-edge (eV)</b> | <b>Peak Position (eV)</b> | <b>Peak Area (units)</b> | <b>Ratio</b> |
|--------------------------|--------------------|---------------------------|--------------------------|--------------|
| <b>CmlI<sup>R</sup></b>  | 7122.1             | 7113.0                    | 0.14                     | 0.1          |
|                          |                    | 7113.1                    | 6.7                      | 4.4          |
|                          |                    | 7114.8                    | 1.5                      | 1.0          |
|                          |                    |                           | <b>Total = 8.3</b>       |              |
| <b>CmlI<sup>Ox</sup></b> | 7124.1             | 7113.4                    | 4.9                      | 1.0          |
|                          |                    | 7115.0                    | 9.6                      | 2.0          |
|                          |                    |                           | <b>Total = 14.5</b>      |              |
| <b>CmlI<sup>P</sup></b>  | 7124.9             | 7113.7                    | 5.1                      | 1.0          |
|                          |                    | 7114.9                    | 14.1                     | 2.8          |
|                          |                    |                           | <b>Total = 19.2</b>      |              |

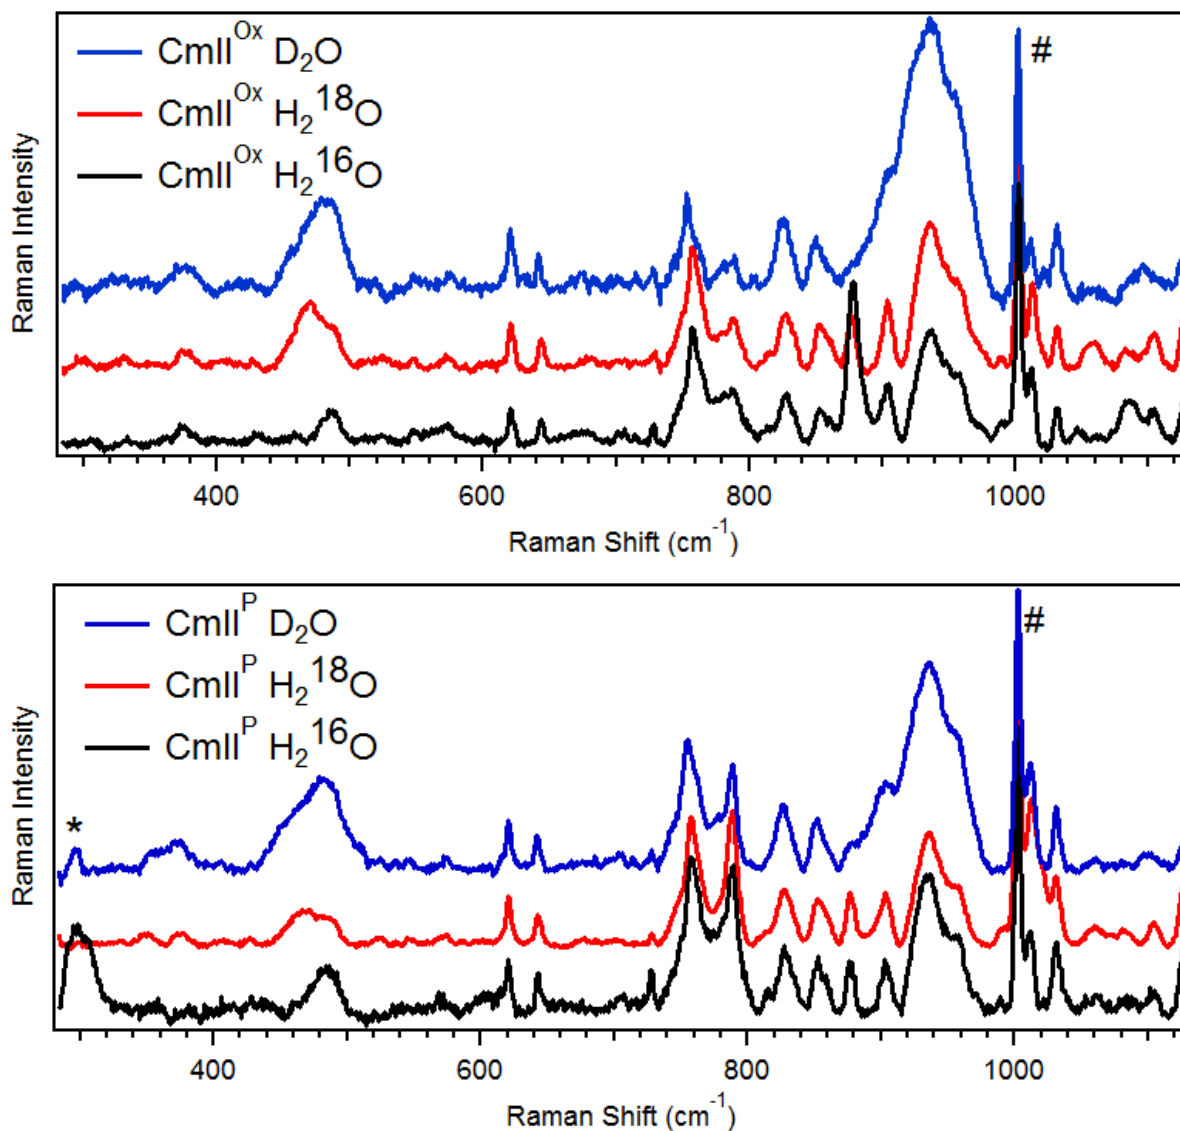

**Figure S7.** Full resonance Raman spectra for **CmlI<sup>Ox</sup>** (top) and **CmlI<sup>P</sup>** (bottom) in H<sub>2</sub><sup>16</sup>O (black), H<sub>2</sub><sup>18</sup>O (red) and D<sub>2</sub><sup>16</sup>O (blue).  $\lambda_{\text{ex}} = 561 \text{ nm}$ , Power =  $\sim 100 \text{ mW}$ . All spectra were collected in solution at  $\sim 4 \text{ }^\circ\text{C}$ . Protein concentration  $\sim 1 \text{ mM}$  for each sample, 50 mM Bicine pH/pD = 9. H<sub>2</sub><sup>18</sup>O enrichment of the samples was  $\sim 60\%$ . All spectra were normalized to the sharp protein feature at  $1002 \text{ cm}^{-1}$  marked with #. Removal of the fluorescence background affected the normalization such that the intensities of the resonance Raman peaks are not necessarily comparable. The peak marked with \* is an artifact of the fluorescence background subtraction.
